# Supplementary material
Source: PubMed Central journal article supplement (PMC2997376)
Supplement: mmc1.pdf [file mmc1.pdf]

Supplemental Data

Rare Copy Number Variants Disrupt Genes Regulating  
Vascular Smooth Muscle Cell Adhesion and Contractility  
in Sporadic Thoracic Aortic Aneurysms and Dissections

Siddharth K. Prakash, Scott A. LeMaire, Dong-Chuan Guo, Ludivine Russell,  
Ellen S. Regalado, Hossein Golabbakhsh, Ralph J. Johnson, Hazim J. Safi,  
Anthony L. Estrera, Joseph S. Coselli, Molly S. Bray, Suzanne M. Leal,  
Dianna M. Milewicz, and John W. Belmont

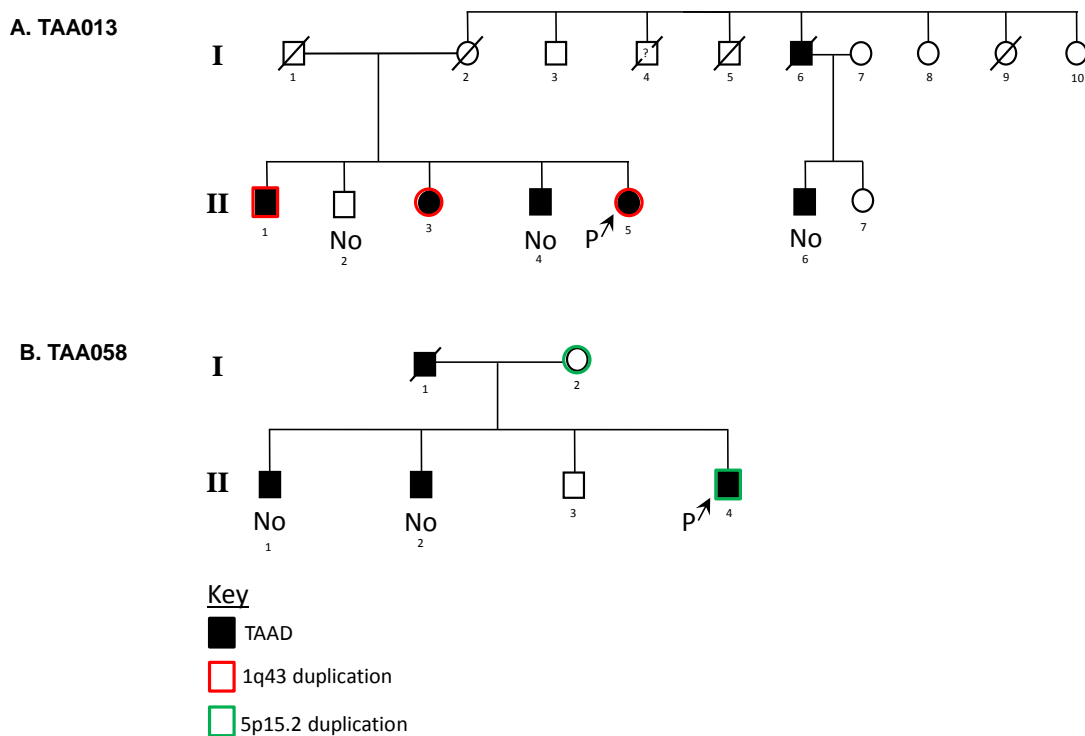

**Figure S1. Rare CNVs Are Inherited but Do Not Segregate with FTAAD in Two Pedigrees**

Circles indicate females; squares indicate males; the legend indicates affected status and the presence or absence of CNVs in family members; individuals who were confirmed not to harbor the CNV are labeled “No”.

(A) In family TAA013, a 340 Kb duplication involving six genes in 1q43 (coordinates 239561201-239903600) is not present in two affected relatives (II-4 and II-6) of the proband (II-5, indicated by the letter P with arrow).

(B) In family TAA058, a 250 Kb duplication involving the *DAP* gene in 5p15.2 (coordinates 10763247-11011635) is present in the unaffected mother (I-2) of the proband (II-4).

**A.**

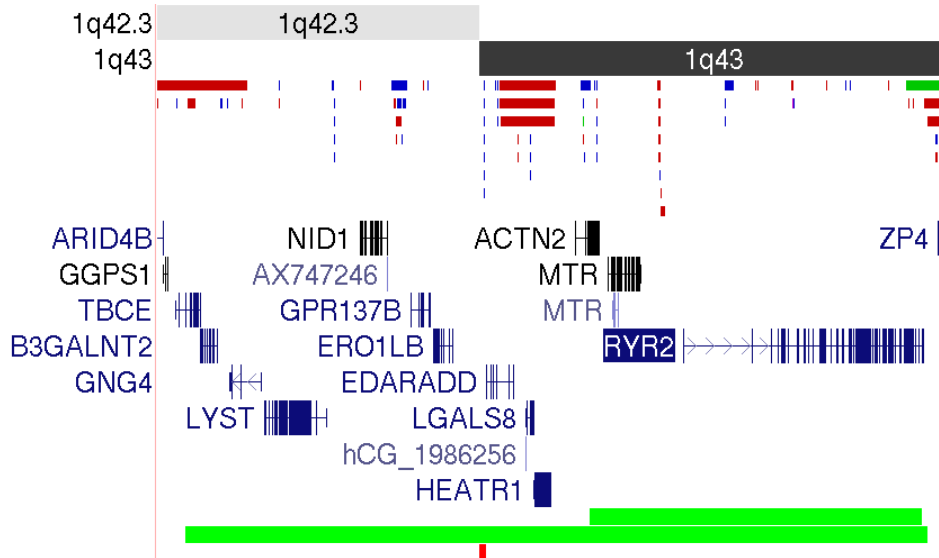

**B.**

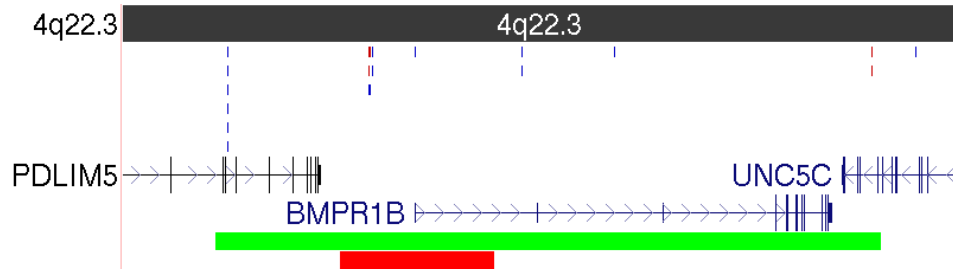

**C.**

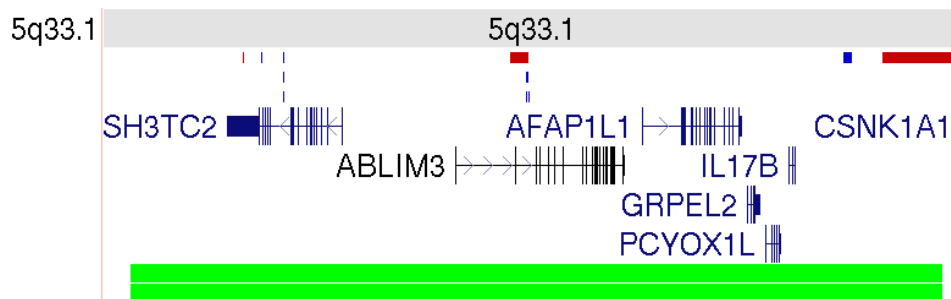

D.

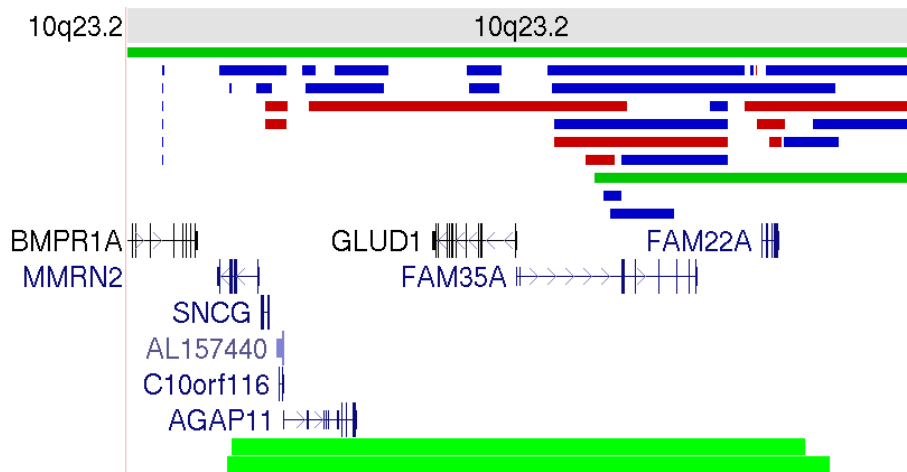

E.

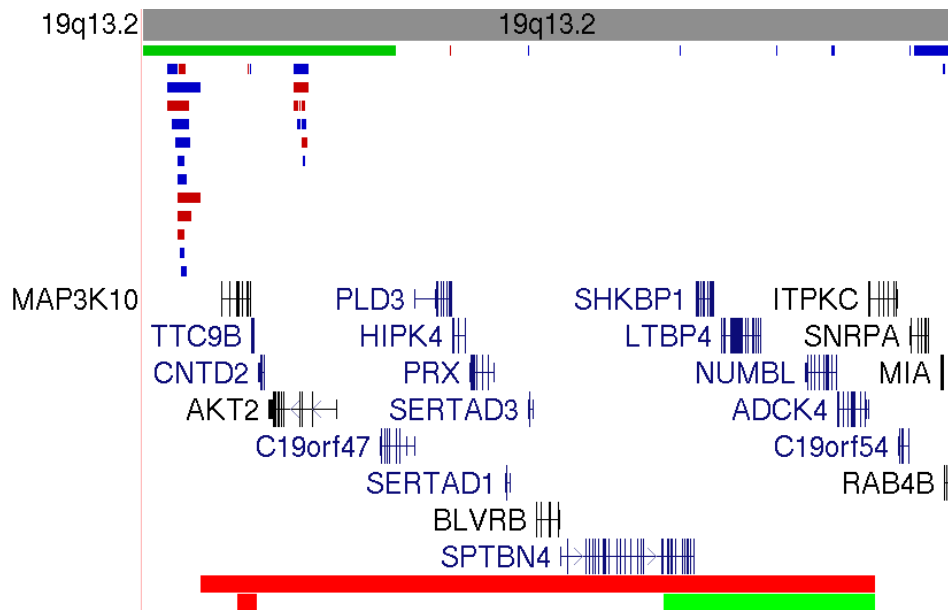

**Figure S2. Five Large, Rare and Recurrent CNV Regions in TAAD Cases as Illustrated in the UCSC Genome Browser**

Chromosomal coordinates are in base pairs. CNVs in TAAD cases (labelled as TAAD) and in unaffected individuals in the Database of Genomic Variants (labelled as DGV) are shown as red bars (deletions), green bars (duplications) or blue bars (deletions and duplications).

- (A) Two duplications involving a common 1 Mb region of 1q43 with three genes;
- (B) two duplications and one deletion involving the *BMPR1B* gene in 4q22.3;
- (C) two duplications involving six genes in 5q33.1;
- (D) two duplications involving seven genes in 10q23.2;
- (E) one duplication and one deletion involving six genes in 19q13.2.

**Table S1. Control and TAAD Datasets Used for Association Tests**

| <b>Dataset</b>                                                                                                                         | <b>dbGAP Accession</b> | <b>Platform</b> | <b>Original</b> | <b>Selected</b> | <b>Filtered</b> | <b>CNVs</b> | <b>Cutoff</b> |
|----------------------------------------------------------------------------------------------------------------------------------------|------------------------|-----------------|-----------------|-----------------|-----------------|-------------|---------------|
| Study of Addiction: Genetics and Environment (SAGE)                                                                                    | phs000092.v1.p1        | 1M              | 3847            | 1152            | 1092            | 70          | 150           |
| National Institute of Neurological Disorders and Stroke (NINDS) Repository Neurologically Normal Control Collection                    | phs000004.v1.p1        | 370D            | 2723            | 848             | 816             | 37          | 73            |
| Whole Genome Association Twin Study of Myopia and Glaucoma Risk Factors                                                                | phs000142.v1.p1        | 610Q            | 2994            | 1802            | 1783            | 43          | 160           |
| A Genome Wide Scan of Lung Cancer and Smoking                                                                                          | phs000093.v2.p2        | 550HH           | 1629            | 827             | 791             | 25          | 125           |
| Age related Macular Degeneration (AMD)--Michigan, Mayo, AREDS, Pennsylvania (MMAP) Cohort Study: A Joint Genome Wide Association Study | phs000182.v1.p1        | 370Q            | 1545            | 459             | 440             | 44          | 94            |
| <b>TOTAL CONTROLS</b>                                                                                                                  |                        |                 | <b>12738</b>    | <b>5088</b>     | <b>4922</b>     |             |               |
| STAAD BCM                                                                                                                              |                        | 370Q            |                 | 418             | 392             | 45          | 140           |
| STAAD UTHSC                                                                                                                            |                        | 370Q            |                 | 387             | 366             | 40          | 140           |
| FTAAD                                                                                                                                  |                        | 660W            |                 | 122             | 87*             | 16          | 68            |
| <b>TOTAL TAAD</b>                                                                                                                      |                        |                 |                 | <b>927</b>      | <b>856</b>      |             |               |

Platform: Illumina Beadchips used for each dataset (1M:1M-Duo, 370D:CNV370-Duo, 610Q: 610-Quad; 550HH: HumanHap-550K; 370Q: CNV370-Quad, 660W: 660-Quad); Original: Total number of genotypes in each dataset available for general research use; Selected: Subset of genotypes selected for analysis; Filtered: Remaining genotypes after quality control; CNVs: average number of CNVs per individual in each dataset; Cutoff: individuals with more CNV calls were excluded from further analysis.

**Table S2. Rare CNV Regions in UTHSCH TAAD Patients**

| Chr | Start     | Length  | Gene(s)                                                                                                                                    | Copy                   | Cases  | Controls |
|-----|-----------|---------|--------------------------------------------------------------------------------------------------------------------------------------------|------------------------|--------|----------|
| 2   | 54131764  | 2002168 | <i>C2ORF73, ACYP2, SPTBN1<sup>a</sup>, RTN4<sup>d</sup>, RPS27A, MTIF2, CCDC104, SMEK2, PNPT1, EFEMP1, CCDC88A</i>                         | Gain <sup>b</sup>      | 2      | 0        |
| 5   | 78387268  | 116492  | <i>BHMT, BHMT2, DMGDH</i>                                                                                                                  | Gain <sup>b</sup>      | 2      | 2        |
| 10  | 81660001  | 350548  | <i>SFTPD, C10ORF57, PLAC9, ANXA11</i>                                                                                                      | Gain/Loss <sup>b</sup> | 2      | 2        |
| 16  | 14929488  | 1509330 | <i>MYH11, ABCC6, NOMO2, NDE1, ABCC1, MPV17L, C16ORF45, C16ORF63, KIAA0430, NTAN1</i>                                                       | Gain <sup>c</sup>      | 7(B,F) | 5        |
| 1   | 11697543  | 284456  | <i>AGTRAP, MTHFR, CLCN6<sup>d</sup>, NPPA<sup>d</sup>, NPPB<sup>d</sup>, PLOD1<sup>d</sup>, MFN2<sup>a</sup>, TNFRSF8, TNFRSF1B, PRDM2</i> | Gain                   | 1      | 0        |
| 1   | 71194152  | 119439  | <i>PTGER3<sup>a</sup>, ZRANB2<sup>a</sup></i>                                                                                              | Gain                   | 1      | 0        |
| 1   | 176939550 | 127554  | <i>RALGPS2<sup>a</sup></i>                                                                                                                 | Gain                   | 1      | 0        |
| 1   | 233605643 | 287563  | <i>GNG4, LYST<sup>a</sup></i>                                                                                                              | Gain                   | 1      | 1        |
| 1   | 235967993 | 109591  | <i>RYR2<sup>a</sup></i>                                                                                                                    | Gain                   | 1      | 1        |
| 2   | 238637566 | 165432  | <i>ILKAP, KLHL30, ESPNL, SCLY<sup>a</sup></i>                                                                                              | Gain                   | 1      | 0        |
| 3   | 65485437  | 965991  | <i>MAG1<sup>a</sup>, SLC25A26<sup>a</sup></i>                                                                                              | Gain                   | 1      | 1        |
| 4   | 65791505  | 158105  | <i>EPHA5</i>                                                                                                                               | Loss                   | 1      | 0        |
| 4   | 95973863  | 372128  | <i>BMPR1B, PDLIM5<sup>a</sup></i>                                                                                                          | Gain                   | 1(B)   | 0        |
| 4   | 159268470 | 552656  | <i>RXFP1<sup>d</sup>, C4orf18, TMEM144, ETFDH<sup>a</sup></i>                                                                              | Gain                   | 1      | 0        |
| 4   | 165729934 | 413958  | <i>TRIM61</i>                                                                                                                              | Gain                   | 1      | 1        |
| 5   | 37537353  | 358478  | <i>GDNF, WDR70<sup>a,d</sup></i>                                                                                                           | Gain                   | 1      | 0        |
| 5   | 72435947  | 579062  | <i>RGNEF<sup>a</sup>, FOXD1, BTF3, UTP15, ANKRA2, TMEM171, TMEM174</i>                                                                     | Gain                   | 1      | 0        |
| 5   | 76205711  | 548115  | <i>PDE8B<sup>a</sup>, AGGF1, CRHBP, ZBED3, S100Z<sup>a</sup></i>                                                                           | Gain                   | 1      | 0        |
| 5   | 79048094  | 591370  | <i>THBS4, CMYA5, SERINC5<sup>d</sup>, MTX3</i>                                                                                             | Loss                   | 1      | 1        |
| 5   | 142058254 | 631925  | <i>ARHGAP26, NR3C1<sup>a</sup>, FGF1<sup>a</sup></i>                                                                                       | Gain                   | 1      | 0        |
| 5   | 148274871 | 566620  | <i>ABLIM3, AFAP1L1, SH3TC2, HTR4, GRPEL2, PCYOX1L, IL17B</i>                                                                               | Gain                   | 1(B)   | 0        |
| 6   | 45050278  | 439793  | <i>SUPT3H</i>                                                                                                                              | Loss                   | 1      | 0        |
| 6   | 82862011  | 286885  | <i>IBTK, TPBG</i>                                                                                                                          | Gain                   | 1      | 0        |
| 6   | 105720900 | 659049  | <i>PREP<sup>d</sup>, POPDC3</i>                                                                                                            | Loss                   | 1      | 0        |
| 6   | 151566770 | 522945  | <i>AKAP12<sup>d</sup>, ZBTB2, RMND1<sup>d</sup>, C6ORF211<sup>d</sup>, C6ORF97<sup>d</sup>, ESR1<sup>a</sup></i>                           | Gain                   | 1      | 1        |
| 7   | 11164718  | 277626  | <i>THSD7A<sup>a</sup>, PHF14<sup>a</sup></i>                                                                                               | Gain                   | 1      | 0        |
| 7   | 33820265  | 168561  | <i>BMPER<sup>a</sup></i>                                                                                                                   | Gain                   | 1      | 1        |

|    |           |         |                                                                                                                                 |      |      |   |
|----|-----------|---------|---------------------------------------------------------------------------------------------------------------------------------|------|------|---|
| 7  | 94753911  | 24612   | <i>PON1<sup>a</sup>,PPP1R9<sup>a</sup></i>                                                                                      | Gain | 1    | 0 |
| 8  | 87256311  | 201843  | <i>WWP1<sup>a</sup></i>                                                                                                         | Gain | 1    | 1 |
| 8  | 106724085 | 733759  | <i>FOG2<sup>a</sup></i>                                                                                                         | Gain | 1    | 0 |
| 9  | 3360161   | 1478714 | <i>RFX3<sup>a</sup>,PPAPDC2<sup>d</sup>,C9ORF68<sup>d</sup>,CDC37L1<sup>d</sup>,AK3,RCL1<sup>a</sup></i>                        | Gain | 1    | 0 |
| 9  | 70696280  | 646370  | <i>PIP5K1B<sup>d</sup>,FXN<sup>d</sup>,TJP2<sup>d</sup>,C9ORF61</i>                                                             | Gain | 1    | 1 |
| 9  | 116808501 | 244161  | <i>TNC,DEC1</i>                                                                                                                 | Loss | 1    | 0 |
| 10 | 88690618  | 321450  | <i>EMILIN3<sup>a</sup>,SNCG,AGAP11,C10ORF116,GLUD1</i>                                                                          | Gain | 1    | 0 |
| 11 | 3585600   | 108374  | <i>NUP98<sup>a</sup>,ART1,ART5,CHRNA10</i>                                                                                      | Gain | 1    | 0 |
| 11 | 44771655  | 106204  | <i>TSPAN1</i>                                                                                                                   | Loss | 1    | 1 |
| 11 | 133512319 | 609098  | <i>JAM3<sup>a</sup>,NCAPD3,ACAD8,B3GAT1,GLB1L2<sup>d</sup>,GLB1L3<sup>d</sup>,VPS26B,THYN1</i>                                  | Gain | 1    | 0 |
| 12 | 27112222  | 567519  | <i>PPFIBP1,STK38L,ARNTL2</i>                                                                                                    | Gain | 1    | 1 |
| 12 | 123719029 | 242979  | <i>SCARB1</i>                                                                                                                   | Gain | 1    | 1 |
| 13 | 19275448  | 452134  | <i>ZMYM2,GJA3<sup>d</sup>,GJB2<sup>d</sup></i>                                                                                  | Gain | 1    | 0 |
| 13 | 24172526  | 262493  | <i>CENPJ,RNF17<sup>a</sup></i>                                                                                                  | Gain | 1    | 0 |
| 15 | 37439530  | 440597  | <i>THBS1,FSIP1</i>                                                                                                              | Gain | 1    | 0 |
| 15 | 97611698  | 460871  | <i>MEF2A<sup>a</sup>,LRRC28<sup>a,d</sup></i>                                                                                   | Gain | 1    | 0 |
| 16 | 76251592  | 147425  | <i>VAT1L,NUDT7</i>                                                                                                              | Loss | 1    | 0 |
| 16 | 83156705  | 51323   | <i>COTL1,WFDC1,KCNG4,LRRC50,HSDL1,TAF1C,MBTPS1,SLC38A8,NECAB2,ATP2C2<sup>d</sup>,OSGIN1,HSBP1,MLYCD,ADAD2,CDH13<sup>d</sup></i> | Loss | 1    | 0 |
| 17 | 14045669  | 1353365 | <i>COX10<sup>a</sup>,CDRT15,HS3ST3B1,PMP22,TEKT3,CDRT4<sup>a</sup></i>                                                          | Loss | 1(B) | 1 |
| 17 | 75450416  | 147025  | <i>TBC1D16<sup>a</sup></i>                                                                                                      | Gain | 1    | 0 |
| 18 | 27738638  | 270504  | <i>RNF125,RNF138,KIAA1012<sup>a</sup></i>                                                                                       | Gain | 1    | 0 |
| 18 | 42827852  | 345178  | <i>IER3IP1,CORL2,HDHD2</i>                                                                                                      | Loss | 1    | 0 |
| 19 | 45748633  | 171836  | <i>SPTBN4<sup>a</sup>,SHKBP1,LTBP4,NUMBL,ADCK4,ITPKC<sup>a</sup></i>                                                            | Gain | 1(B) | 0 |
| 20 | 2695481   | 255546  | <i>PTPRA<sup>a</sup>,C20ORF141,FAM113A,VPS16,CPXM1</i>                                                                          | Gain | 1    | 0 |
| 20 | 3732593   | 93445   | <i>CDC25B<sup>a</sup>,C20ORF29,PANK2<sup>a</sup>,VISA</i>                                                                       | Gain | 1    | 0 |
| 20 | 17941461  | 184763  | <i>CSRP2BP,QVOL2</i>                                                                                                            | Gain | 1    | 0 |
| 21 | 45574146  | 126365  | <i>COL18A1<sup>a</sup></i>                                                                                                      | Gain | 1    | 0 |
| X  | 134217460 | 448164  | <i>ZNF75D,ZNF449,DDX26B</i>                                                                                                     | Gain | 1    | 1 |
| X  | 152323546 | 309812  | <i>TREX2,DUSP9,BGN,UCH5IP,ATP2B3,FAM58A,PNCK,SLC6A,BCAP31<sup>a</sup></i>                                                       | Gain | 1    | 0 |
| X  | 153846405 | 363482  | <i>F8<sup>a</sup>,FUNDG2,MTCP1,BRCC3,VBP1,RAB39B,CLIC2<sup>d</sup></i>                                                          | Gain | 1    | 0 |

Chr: chromosome; Start: beginning of CNV based on build 36.1 of the reference genome; Length: size of CNV in base pairs; Type: duplication (Gain) or deletion (Loss); Controls: prevalence of CNV in control population (4922 individuals); CNVRs that occur in more than one case are listed first; known aneurysm-associated genes are shown in bold type; Genes that are expressed at above average levels in SMCs are underlined; Presence of CNVRs in BCM (B) or familial (F) groups is indicated by parentheses. Footnotes: <sup>a</sup>genes that are potentially disrupted by duplications; <sup>b</sup>p=0.005; <sup>c</sup>p=3x10<sup>-7</sup>; <sup>d</sup>genes that overlap with 1-2 additional control CNVs.

**Table S3. Rare CNV Regions in FTAAD Patients**

| Chr | Start     | Length  | Gene(s)                                                                                                                                       | Copy              | Cases  | Controls |
|-----|-----------|---------|-----------------------------------------------------------------------------------------------------------------------------------------------|-------------------|--------|----------|
| 1   | 205611610 | 113158  | <i>CD55,CR2</i>                                                                                                                               | Loss <sup>b</sup> | 1      | 0        |
| 1   | 234964786 | 1096137 | <i>RYR2<sup>a,e</sup>,ACTN2<sup>a</sup>,MTR</i>                                                                                               | Gain <sup>c</sup> | 1(U)   | 0        |
| 1   | 239561201 | 342399  | <i>KMO,RGS7<sup>a</sup>,FH,OPN3,CHML,WDR64<sup>a</sup></i>                                                                                    | Gain <sup>d</sup> | 1      | 1        |
| 1   | 244960571 | 73951   | <i>SCCPDH<sup>f</sup></i>                                                                                                                     | Gain <sup>c</sup> | 1      | 1        |
| 2   | 175176015 | 519204  | <i>WIPF1<sup>a</sup>,CHRNA1,CHN1,ATF2<sup>a</sup></i>                                                                                         | Gain <sup>b</sup> | 1      | 0        |
| 4   | 25182217  | 702217  | <i>SLC34A2,KIAA0746,C4ORF52</i>                                                                                                               | Loss <sup>b</sup> | 1      | 0        |
| 5   | 10763247  | 248388  | <i>CTNND2<sup>a</sup>,DAP<sup>a</sup></i>                                                                                                     | Gain <sup>b</sup> | 1      | 0        |
| 5   | 121629459 | 182236  | <i>SNCAIP<sup>a</sup></i>                                                                                                                     | Gain <sup>c</sup> | 1      | 1        |
| 7   | 72360917  | 1417070 | <i>BAZ1B,BCL7B,TBL2,MLXIPL,VPS37D,DNAJC30,WBSCR22,STX1A,ABHD11,CLDN3,CLDN4,WBSCR27,WBSCR28,ELN,LIMK1,EIF4H,LAT2,RFC2,CLIP2,GTF2IRD1,GTF2I</i> | Gain <sup>b</sup> | 1      | 0        |
| 10  | 34837591  | 356761  | <i>PARD3<sup>a</sup></i>                                                                                                                      | Gain <sup>c</sup> | 1      | 1        |
| 10  | 88690618  | 308237  | <i>EMILIN3<sup>a</sup>,SNCG,AGAP11,C10ORF116,GLUD1<sup>e</sup></i>                                                                            | Gain <sup>b</sup> | 1(U)   | 0        |
| 10  | 90468463  | 113624  | <i>LIPK,LIPM,LIPN,ANKRD22<sup>a</sup></i>                                                                                                     | Gain <sup>b</sup> | 1      | 0        |
| 12  | 21580167  | 79075   | <i>GYS2</i>                                                                                                                                   | Loss <sup>b</sup> | 1      | 0        |
| 13  | 95429222  | 513627  | <i>UGCGL2<sup>a</sup>,HS6ST3<sup>a</sup></i>                                                                                                  | Gain <sup>b</sup> | 1      | 0        |
| 15  | 99293837  | 172652  | <i>LRRK1</i>                                                                                                                                  | Loss <sup>b</sup> | 1      | 0        |
| 16  | 15162734  | 3011916 | <i>MPV17L,NDE1,MYH11,ABCC6,ABCC1,KIAA0430</i>                                                                                                 | Gain <sup>c</sup> | 1(B,U) | 5        |
| 17  | 5087194   | 702887  | <i>RABEP1,NUP88,RPAIN,C1QBP,DHX33,DERL2,MIS12,NLRP1</i>                                                                                       | Gain <sup>b</sup> | 1      | 0        |
| 18  | 73083303  | 40807   | <i>GALR1</i>                                                                                                                                  | Gain <sup>b</sup> | 1(B)   | 1        |
| 19  | 17122367  | 273531  | <i>MYO9B,USE1,OCEL1,NR2F6,USHBP1,C19orf62,ANKLE1</i>                                                                                          | Loss <sup>b</sup> | 1      | 0        |
| 19  | 46954731  | 112353  | <i>CEACAM3,CEACAM6<sup>a</sup>,LYPD4,DMRTC2,RPS19<sup>a</sup></i>                                                                             | Gain <sup>b</sup> | 1      | 0        |

Chr: chromosome; Start: beginning of CNV based on build 36.1 of the reference genome; Length: size of CNV in base pairs; Type: duplication (Gain) or deletion (Loss); Controls: prevalence of CNV in control population (4922 individuals); known aneurysm-associated genes are shown in bold type; Genes that are expressed at above average levels in vascular SMCs are underlined; Presence of CNVRs in BCM (B) or UTHSCH (U) groups is indicated by parentheses. Footnotes: <sup>a</sup>genes that are potentially disrupted by duplications; <sup>b</sup>p=0.02; <sup>c</sup>p=0.05; <sup>d</sup>p=0.04; <sup>e</sup>genes that overlap with 1-2 additional control CNVs
